# Supplementary material for: Big brains stabilize populations and facilitate colonization of variable habitats in birds
Source: Springer Nature journal article supplement (doi:10.1038/s41559-017-0316-2), 2017-09-22
Supplement: 41559_2017_316_MOESM1_ESM.pdf [file 41559_2017_316_MOESM1_ESM.pdf]

In the format provided by the authors and unedited.

# Big brains stabilize populations and facilitate colonization of variable habitats in birds

Trevor S. Fristoe <sup>1\*</sup>, Andrew N. Iwaniuk <sup>2</sup> and Carlos A. Botero <sup>1</sup>

---

<sup>1</sup>Department of Biology, Washington University in St. Louis, St. Louis, MO 63130, USA. <sup>2</sup>Canadian Centre for Behavioural Neuroscience, University of Lethbridge, Lethbridge, Alberta T1K 6T5, Canada. \*e-mail: [tfristoe@wustl.edu](mailto:tfristoe@wustl.edu)

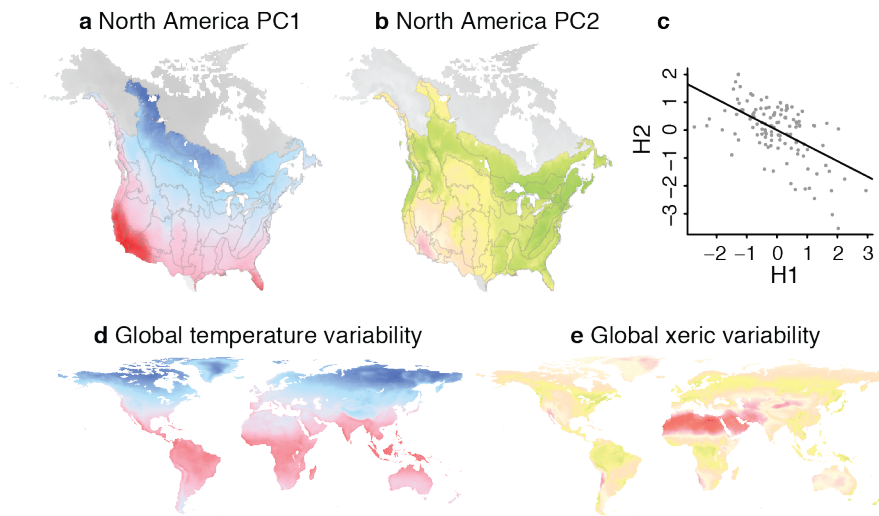

Supplementary Figure 1: **Continental and global patterns in environmental variables.** **a-b**, PCA of environmental variables across North America returned two composite environmental variables. Low values of the first component (**a**) were associated with cold environments with variable, unpredictable temperatures (in blue); high values were found in hot environments with variable and unpredictable precipitation patterns (in red). Low values of the second component (**b**) were associated with arid, unproductive environments (in red) while high values represented wet areas with high but variable and unpredictable net primary productivity (in green). PC values are shown in color only within Bird Conservation Regions that included sufficient population data for at least one species (outlined in grey). **c**, Species-specific weighted averages for these components (H1 and H2, see text) are highly correlated ( $r = -0.56$ ). **d-e**, Environmental variables were also properly summarized with two principal components at a global scale. **d**, In this case, regions that scored higher in temperature variability (depicted as bluer) exhibit colder, seasonally variable, and more unpredictable temperatures. **e**, Regions that scored high in xeric variability (depicted as redder) exhibit increasingly arid and unproductive conditions and more unpredictable rainfall.

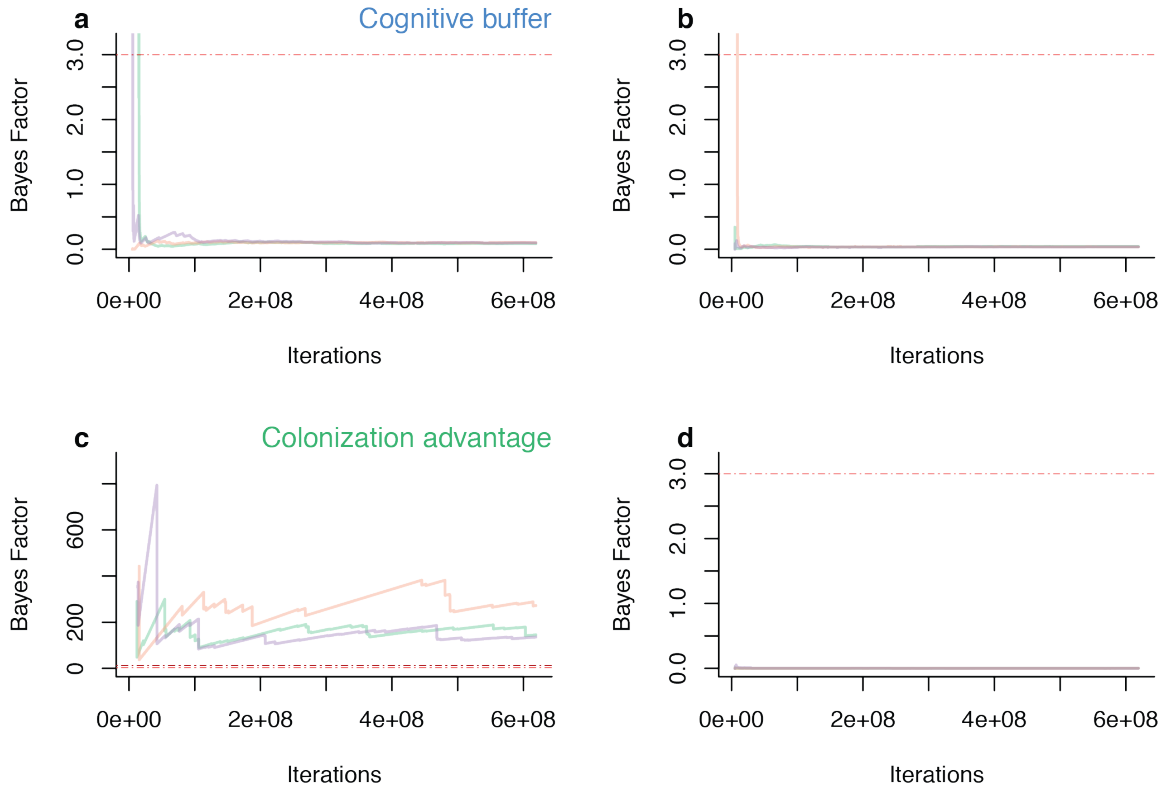

Supplementary Figure 2: **Running values of Bayes Factors across iterations for extended MCMC chains with 50<sup>th</sup> percentile brain threshold and 75<sup>th</sup> percentile environment threshold. a-d**, Bayes factors calculated across iterations for testing support for differences between: the transition to large brains in stable vs variable environments (**a**); the transition to small brains in stable vs harsh environments (**b**); the transition to variable environments in small vs large brained species (**c**); the transition to stable environments in small vs large brained species (**d**). Purple, green, and orange lines represent results for three independently run replicates. Dashed red lines indicate the minimum Bayes Factor indicating good (BF = 3) or strong (BF = 12) support differences between rates. While effective sample sizes in these models had not reached 1,000 by 600 million iterations, it is nevertheless clear that the conclusions to support (**c**) or reject (**a**, **b**, and **d**) all of these transition rate differences are remarkably stable.

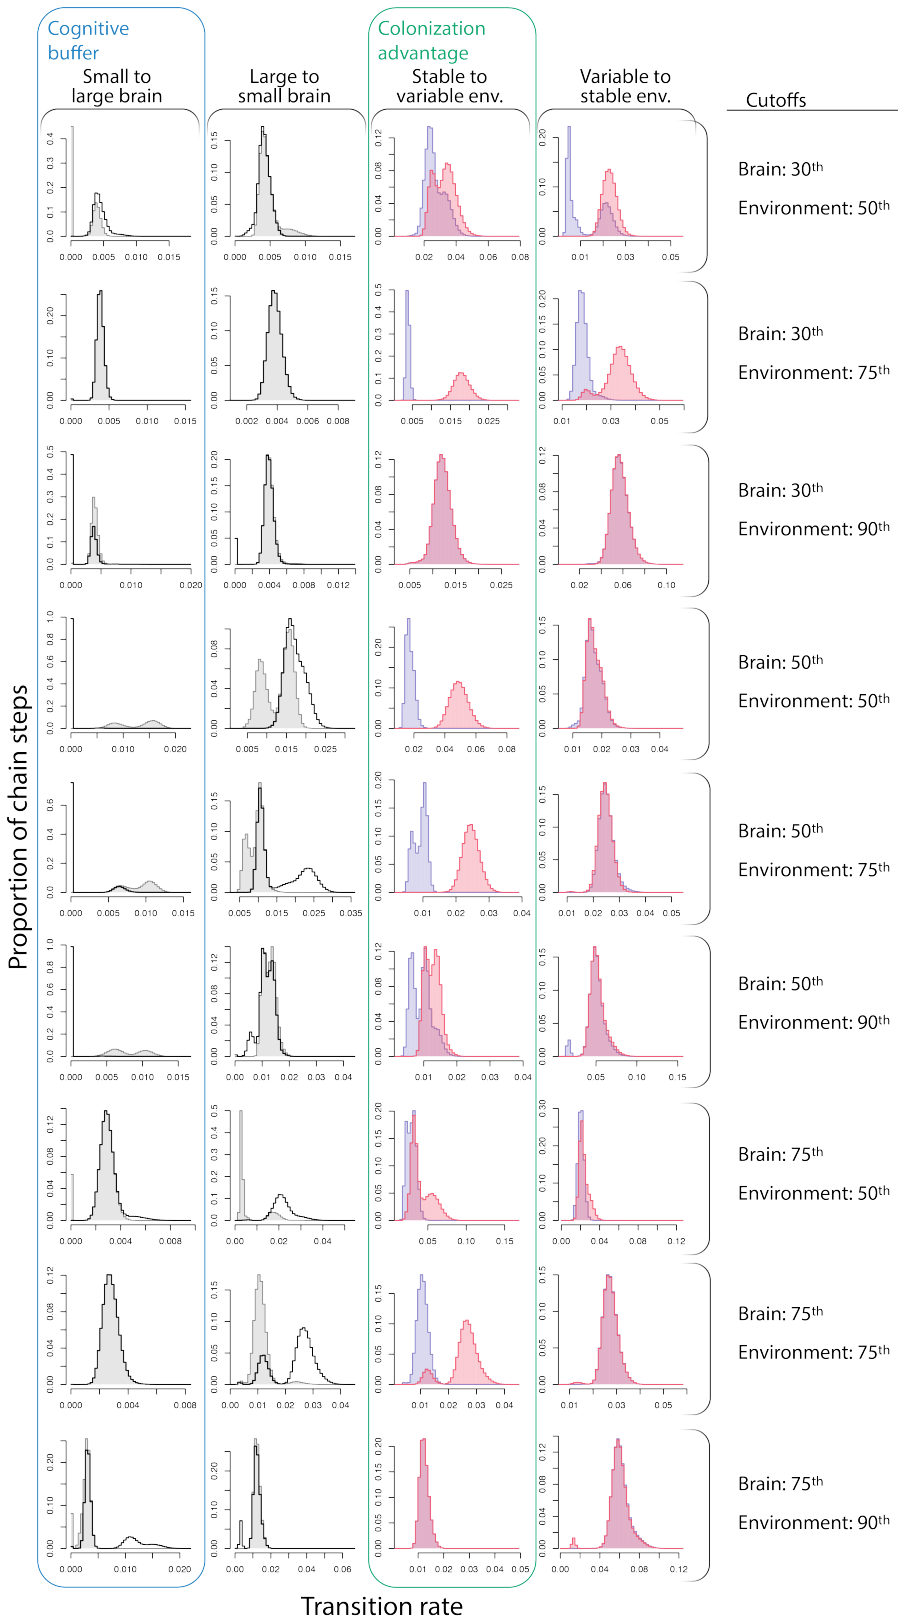

Supplementary Figure 3: **Posterior distributions of transition rates estimated with reversible-jump MCMC analysis.** Plots within each column depict the posterior distributions for the transition rate of a particular trait, with the color of each distribution depicting the state of the second trait: gray distributions indicate rates of brain size transition within stable environments, black outlined distributions indicate rates of brain size transition within variable environments, purple distributions indicate rates of environmental transition for small brained species, and pink distributions indicate rates of environmental transition for large brained species. Columns highlighted in blue and green represent transition rates relevant to testing the cognitive buffer and colonization advantage hypotheses respectively. Rows represent the results from rjMCMC analyses performed using different cutoffs to distinguish small from large brained species and stable from variable environments (see methods; cutoffs provided in right margin).

Supplementary Table 1: Phylogenetic Generalized Least Squares regression analysis of population stability estimated with a consensus tree\*.

|                                     | $\beta$ | SE   | t     | p       |
|-------------------------------------|---------|------|-------|---------|
| (Intercept)                         | -0.17   | 0.07 | -2.33 | 0.02    |
| H1 <sup>2†</sup>                    | 0.06    | 0.04 | 1.67  | 0.10    |
| Migration                           | -0.03   | 0.03 | -1.32 | 0.19    |
| Relative brain size                 | -0.01   | 0.05 | -0.23 | 0.82    |
| log(Longevity)                      | 0.03    | 0.02 | 1.30  | 0.19    |
| Migration:H1 <sup>2†</sup>          | 0.05    | 0.01 | 3.60  | < 0.001 |
| log(Longevity):H1 <sup>2</sup>      | -0.06   | 0.02 | -3.89 | < 0.001 |
| Relative brain size:H1 <sup>2</sup> | 0.08    | 0.02 | 4.91  | < 0.001 |

df = 118     $\lambda = 0.61$

\* Only terms present in the final reduced model are presented here (see text for details).

† H1<sup>2</sup> is the quadratic term of composite measure, H1, which captures various aspects of environmental variability. Low values of H1 represent cold seasonal habitats with unpredictable temperatures; high values represent warm habitats characterized by variable and unpredictable patterns of precipitation.

Supplementary Table 2: Summary of principal component analysis of environmental variables in our global analysis<sup>†</sup>.

|                       | Loadings     |              | Uniqueness |
|-----------------------|--------------|--------------|------------|
|                       | PC1          | PC2          |            |
| Temp predictability   | <b>-0.94</b> | 0.03         | 0.11       |
| log Temp variance     | <b>0.94</b>  | -0.04        | 0.11       |
| Mean temp             | <b>-0.91</b> | 0.10         | 0.16       |
| NPP predictability    | <b>0.71</b>  | <b>0.63</b>  | 0.10       |
| log Precip variance   | <b>-0.68</b> | <b>-0.54</b> | 0.24       |
| Precip predictability | 0.27         | <b>-0.83</b> | 0.24       |
| log Mean precip       | -0.35        | <b>-0.82</b> | 0.20       |
| log Mean NPP          | -0.45        | <b>-0.80</b> | 0.16       |
| log NPP variance      | 0.13         | <b>-0.78</b> | 0.37       |
| Cumulative variance   | 0.44         | 0.81         |            |

<sup>†</sup> Loadings for main contributors to each component are highlighted in boldface type. PC1 was included in analyses as temperature variability; PC2 was included as xeric variability.

Supplementary Table 3: Results from models of correlated trait evolution performed using reverse-jump MCMC in BayesTraits v2. For these analyses, species were classified as having either small or large encephalization based on brain size residuals calculated from PGLS regression with Pagel's  $\lambda$  transformation. Rates related to the predictions of the cognitive buffer hypothesis are highlighted in blue; rates related to the predictions of the colonization advantage scenario are highlighted in green. The dependence of particular transition rates in one trait on the state of the second trait were assessed by calculating Bayes Factors (BF) and the proportion of chain steps that set the rate of interest as equal under both states of the second trait (P).

| Brain cutoff     | Env. cutoff      | Brain          | Environment   | Mean         | SD    | BF             | P      |
|------------------|------------------|----------------|---------------|--------------|-------|----------------|--------|
| 30 <sup>th</sup> | 50 <sup>th</sup> | Small to large | Mild          | 0.002        | 0.002 | 0.04           | 0.54   |
|                  |                  | Small to large | Harsh         | 0.004        | 0.001 |                |        |
|                  |                  | Large to small | Mild          | 0.005        | 0.001 | 0.01           | 0.89   |
|                  |                  | Large to small | Harsh         | 0.004        | 0.001 |                |        |
|                  |                  | Small          | Mild to harsh | 0.027        | 0.006 | 0.02           | 0.64   |
|                  |                  | Large          | Mild to harsh | 0.033        | 0.007 |                |        |
|                  |                  | Small          | Harsh to mild | 0.012        | 0.008 | 0.06           | 0.42   |
|                  |                  | Large          | Harsh to mild | 0.023        | 0.003 |                |        |
| 30 <sup>th</sup> | 75 <sup>th</sup> | Small to large | Mild          | 0.004        | 0.000 | < 0.01         | > 0.99 |
|                  |                  | Small to large | Harsh         | 0.004        | 0.001 |                |        |
|                  |                  | Large to small | Mild          | 0.004        | 0.000 | < 0.01         | > 0.99 |
|                  |                  | Large to small | Harsh         | 0.004        | 0.000 |                |        |
|                  |                  | Small          | Mild to harsh | 0.004        | 0.001 | <b>57.02**</b> | < 0.01 |
|                  |                  | Large          | Mild to harsh | <b>0.018</b> | 0.002 |                |        |
|                  |                  | Small          | Harsh to mild | 0.018        | 0.003 | 0.32           | 0.12   |
|                  |                  | Large          | Harsh to mild | 0.033        | 0.007 |                |        |
| 30 <sup>th</sup> | 90 <sup>th</sup> | Small to large | Mild          | 0.004        | 0.001 | 0.04           | 0.50   |
|                  |                  | Small to large | Harsh         | 0.002        | 0.002 |                |        |
|                  |                  | Large to small | Mild          | 0.004        | 0.001 | < 0.01         | 0.95   |
|                  |                  | Large to small | Harsh         | 0.004        | 0.001 |                |        |
|                  |                  | Small          | Mild to harsh | 0.012        | 0.002 | < 0.01         | > 0.99 |
|                  |                  | Large          | Mild to harsh | 0.012        | 0.002 |                |        |
|                  |                  | Small          | Harsh to mild | 0.057        | 0.008 | < 0.01         | 0.99   |
|                  |                  | Large          | Harsh to mild | 0.057        | 0.008 |                |        |
| 50 <sup>th</sup> | 50 <sup>th</sup> | Small to large | Mild          | <b>0.012</b> | 0.004 | <b>3.15*</b>   | 0.01   |
|                  |                  | Small to large | Harsh         | < 0.001      | 0.001 |                |        |
|                  |                  | Large to small | Mild          | 0.013        | 0.004 | 0.03           | 0.58   |
|                  |                  | Large to small | Harsh         | 0.017        | 0.003 |                |        |
|                  |                  | Small          | Mild to harsh | 0.017        | 0.003 | <b>88.63**</b> | < 0.01 |
|                  |                  | Large          | Mild to harsh | <b>0.049</b> | 0.006 |                |        |



|                  |                  |                |               |              |       |                 |        |
|------------------|------------------|----------------|---------------|--------------|-------|-----------------|--------|
|                  |                  | Small          | Harsh to mild | 0.017        | 0.003 |                 |        |
|                  |                  | Large          | Harsh to mild | 0.017        | 0.003 | < 0.01          | 0.96   |
| 50 <sup>th</sup> | 75 <sup>th</sup> | Small to large | Mild          | 0.009        | 0.002 | 0.10            | 0.31   |
|                  |                  | Small to large | Harsh         | 0.002        | 0.003 |                 |        |
|                  |                  | Large to small | Mild          | 0.009        | 0.002 | 0.04            | 0.52   |
|                  |                  | Large to small | Harsh         | 0.016        | 0.006 |                 |        |
|                  |                  | Small          | Mild to harsh | 0.009        | 0.002 | <b>184.11**</b> | < 0.01 |
|                  |                  | Large          | Mild to harsh | <b>0.024</b> | 0.003 |                 |        |
|                  |                  | Small          | Harsh to mild | 0.025        | 0.003 | < 0.01          | 0.95   |
|                  |                  | Large          | Harsh to mild | 0.025        | 0.003 |                 |        |
| 50 <sup>th</sup> | 90 <sup>th</sup> | Small to large | Mild          | 0.008        | 0.002 | 2.76            | 0.02   |
|                  |                  | Small to large | Harsh         | < 0.001      | 0.001 |                 |        |
|                  |                  | Large to small | Mild          | 0.013        | 0.002 | 0.01            | 0.88   |
|                  |                  | Large to small | Harsh         | 0.012        | 0.003 |                 |        |
|                  |                  | Small          | Mild to harsh | 0.009        | 0.003 | 0.03            | 0.57   |
|                  |                  | Large          | Mild to harsh | 0.013        | 0.002 |                 |        |
|                  |                  | Small          | Harsh to mild | 0.049        | 0.011 | < 0.01          | 0.95   |
|                  |                  | Large          | Harsh to mild | 0.052        | 0.009 |                 |        |
| 75 <sup>th</sup> | 50 <sup>th</sup> | Small to large | Mild          | 0.003        | 0.001 | < 0.01          | 0.94   |
|                  |                  | Small to large | Harsh         | 0.003        | 0.001 |                 |        |
|                  |                  | Large to small | Mild          | 0.007        | 0.007 | 0.17            | 0.20   |
|                  |                  | Large to small | Harsh         | 0.022        | 0.005 |                 |        |
|                  |                  | Small          | Mild to harsh | 0.029        | 0.006 | 0.03            | 0.61   |
|                  |                  | Large          | Mild to harsh | 0.041        | 0.014 |                 |        |
|                  |                  | Small          | Harsh to mild | 0.020        | 0.003 | 0.01            | 0.75   |
|                  |                  | Large          | Harsh to mild | 0.024        | 0.005 |                 |        |
| 75 <sup>th</sup> | 75 <sup>th</sup> | Small to large | Mild          | 0.003        | 0.001 | < 0.01          | > 0.99 |
|                  |                  | Small to large | Harsh         | 0.003        | 0.001 |                 |        |
|                  |                  | Large to small | Mild          | 0.011        | 0.003 | 0.12            | 0.26   |
|                  |                  | Large to small | Harsh         | 0.024        | 0.007 |                 |        |
|                  |                  | Small          | Mild to harsh | 0.011        | 0.002 | 0.31            | 0.12   |
|                  |                  | Large          | Mild to harsh | 0.025        | 0.006 |                 |        |
|                  |                  | Small          | Harsh to mild | 0.027        | 0.003 | < 0.01          | 0.99   |
|                  |                  | Large          | Harsh to mild | 0.027        | 0.004 |                 |        |
| 75 <sup>th</sup> | 90 <sup>th</sup> | Small to large | Mild          | 0.003        | 0.001 | 0.02            | 0.72   |
|                  |                  | Small to large | Harsh         | 0.006        | 0.004 |                 |        |
|                  |                  | Large to small | Mild          | 0.012        | 0.002 | < 0.01          | 0.91   |
|                  |                  | Large to small | Harsh         | 0.012        | 0.003 |                 |        |
|                  |                  | Small          | Mild to harsh | 0.012        | 0.002 | < 0.01          | > 0.99 |
|                  |                  | Large          | Mild to harsh | 0.012        | 0.002 |                 |        |
|                  |                  | Small          | Harsh to mild | 0.061        | 0.009 | < 0.01          | 0.97   |
|                  |                  | Large          | Harsh to mild | 0.060        | 0.011 |                 |        |
